# Supplementary material for: Relevance of the Ejaculate Fraction and Dilution Method on Boar Sperm Quality during Processing and Conservation of Seminal Doses
Source: MDPI journal article supplement (doi:10.3390/vetsci8120292), 2021-11-27
Supplement: s1 [file s1]

# Relevance of the Ejaculate Fraction and Dilution Method on Boar Sperm Quality during Processing and Conservation of Seminal Doses

Blanca Sebastián-Abad, Pedro José Llamas-López and Francisco Alberto García-Vázquez

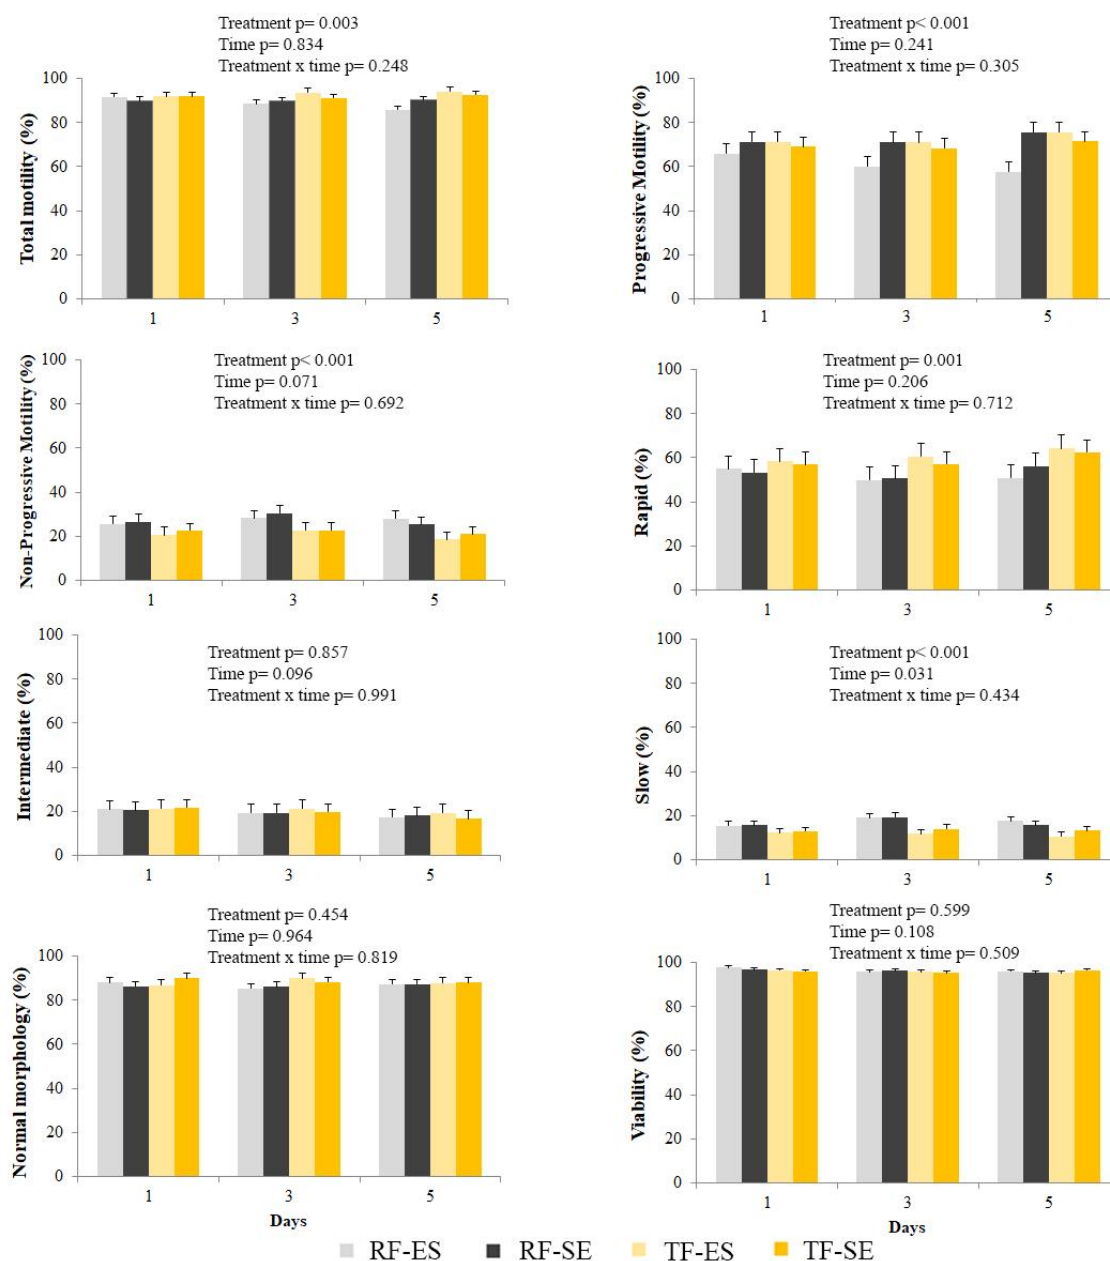

**Supplementary file.** Total motility (%), progressive motility (%), non-progressive motility (%), rapid (%), intermediate (%), slow (%), normal morphology (%), and viability (%) of spermatozoa stored over time (1, 3 and 5 days) in seminal doses containing the rich fraction (RF- grey bars in the graphs) or total fractions (TF- yellow bars in the graphs) of the ejaculate. Seminal doses were

prepared pouring the extender over the semen (ES-light grey/yellow bars in the graphs) or pouring the semen over the extender (SE-dark grey/yellow bars in the graph). Data are shown as mean  $\pm$  SEM.
